# Supplementary material for: Ferromagnetic ordering of –[Sm(iii)-radical]n– coordination polymers
Source: Royal Society of Chemistry journal article supplement (doi:10.1039/c6cc01548d), 2016-01-01
Supplement: c6cc01548d1.pdf [file c6cc01548d1.pdf]

## Supporting Information for

### *Ferromagnetic Ordering of $-\text{[Sm(III)-Radical]}_n-$ Coordination Polymers*

*Elisabeth M. Fatila,<sup>a</sup> Adam C. Maahs,<sup>a</sup> Michelle B. Mills,<sup>a</sup> Mathieu Rouzières,<sup>b,c</sup>*

*Dmitriy V. Soldatov,<sup>a</sup> Rodolphe Clérac,<sup>\*b,c</sup> and Kathryn E. Preuss<sup>\*a</sup>*

<sup>a</sup> Department of Chemistry, University of Guelph, Guelph ON, N1G 2W1, Canada.

<sup>b</sup> CNRS, CRPP, UPR 8641, F-33600 Pessac, France.

<sup>c</sup> Univ. Bordeaux, CRPP, UPR 8641, F-33600 Pessac, France.

#### Experimental Section

**General.** Preparation of  $[\text{Sm}(\text{hfac})_3(\text{boaDTDA})]_n$  (**1**; hfac = 1,1,1,5,5,5-hexafluoroacetylacetonato-; boaDTDA = 4-(benzoxazol-2'-yl)-1,2,3,5-dithiadiazolyl) was performed under argon atmosphere using standard Schlenk line and glovebox techniques. Dried and degassed solvents were obtained from an LC solvent purification system using dry packed columns containing 3 Å molecular sieves. All other reagents were purchased from Aldrich, Alfa Aesar, Strem, and Acros Organics, and used as received. IR spectra were collected using a Nicolet 510-FTIR spectrometer at ambient temperature. Elemental analyses were performed by MHW laboratories in Phoenix, AZ, USA. Sublimations were carried out on a multi-stage programmable tube furnace. Starting material  $\text{Sm}(\text{hfac})_3(\text{DME})$  and boaDTDA radical were prepared according to literature procedures<sup>[1,2]</sup> (DME = 1,2-dimethoxyethane).

**$[\text{Sm}(\text{hfac})_3(\text{boaDTDA})]_n$  (**1**).** Anhydrous dichloromethane (15 mL) was added to a solid mixture of  $\text{Sm}(\text{hfac})_3(\text{DME})$  (0.3029 g, 0.3515 mmol) and boaDTDA (0.0750 g, 0.337 mmol) under argon. The dark brown solution was stirred for 1 hour. The solvent was removed under reduced pressure to afford a dark purple solid. Sublimation of the dark solid at 120 °C at  $10^{-2}$  Torr yielded green needles; yield 0.0753 g (22%). Anal. Calcd. for  $\text{SmC}_{23}\text{H}_7\text{O}_7\text{F}_{18}\text{N}_3\text{S}_2$ : C, 27.80; H, 0.71; N, 4.23%. Found: C, 28.00; H, 0.92; N, 4.31%. IR (KBr): 1647 (vs), 1612 (w), 1561 (mw), 1535 (m), 1490 (ms,sh), 1449 (m), 1435 (w), 1339 (w), 1321 (w), 1256 (vs), 1231 (ms, sh), 1217 (m, sh), 1207 (s), 1143 (vs), 1096 (m), 998 (vw), 945 (vw), 920 (vw), 887 (vw), 847 (w), 804 (m), 784 (w), 762 (mw), 752 (mw), 741 (w), 660 (m), 617 (vw), 587 (m), 546 (vw), 529 (vw), 499 (vw), 468 (vw), 436 (vw)  $\text{cm}^{-1}$ .

**Magnetic Measurements.** Magnetic susceptibility measurements were obtained with the use of a Quantum Design SQUID magnetometer MPMS-XL, which works between 1.8 and 400 K for dc applied fields ranging from -7 to 7 T. For alternating-current (ac) susceptibility measurements, an oscillating ac field of 3 Oe with a frequency between 1 and 1500 Hz was employed. Measurements were performed on 18.3 mg of a polycrystalline sample of **1** sealed in a polypropylene bag (3 × 0.5 × 0.02 cm; 22.4 mg) under argon atmosphere. Prior to the experiments, the field-dependent magnetization was measured at 100 K in order to detect the presence of any bulk ferromagnetic impurities. The sample appeared to be free of any significant ferromagnetic impurities. The magnetic data were corrected for the sample holder and the diamagnetic contribution.

**Crystallographic Measurements.** Two crystals of [Sm(hfac)<sub>3</sub>(boaDTDA)]<sub>n</sub> (**1**) were studied. The green prisms of the complex grown by sublimation in vacuum were mounted on MiTeGen cryoloops, protected with type NVH immersion oil and studied in the flow of nitrogen of required temperature generated by Cryojet XL device (Oxford Instruments). The first crystal with dimensions 0.25 × 0.10 × 0.08 mm was studied at 150 K. The data were collected to the maximum resolution of 0.58 Å (average redundancy > 8). The second crystal, studied subsequently, was 0.70 × 0.20 × 0.20 mm in size. This crystal was selected after screening several samples and no attempt was made to reduce its size in order to avoid cracking. For this second crystal, the data were collected at 100, 200, 250 and 300 K to the maximal resolution of 0.60, 0.64, 0.66 and 0.74 Å, respectively, and average redundancy of 13 or higher.

All measurements were conducted on a SuperNova Agilent single-crystal diffractometer equipped with a microfocus MoK $\alpha$  ( $\lambda$  = 0.71073 Å) radiation source and Atlas CCD detector. Diffraction intensity data were collected using  $\omega$ -scan. The unit cell parameters were refined using the entire data sets. The data were processed using CrysAlisPro software.<sup>[3]</sup> Absorption corrections were applied using the multiscan method. The structure was solved (direct methods) and refined (full-matrix least-squares on  $F^2$ ) using SHELXS and SHELXL-97.<sup>[4]</sup> Geometric calculations were carried out using the WinGX<sup>[5]</sup> and Olex<sup>[6]</sup> software packages.

Non-hydrogen atoms were refined anisotropically, while hydrogen atoms were introduced at calculated positions as riding on their corresponding carbon atoms and refined isotropically. Many CF<sub>3</sub> groups of the hfac ligands were disordered suggesting partially restricted rotation. The disorder was modeled by two complementary orientations with mild restraints on the C-F distances and stricter restraints on the F thermal ellipsoids. Most residual peaks are located near Sm as a result of inadequate absorption correction of a large crystal. A strong residual peak at 100 K as listed under "Alert level A" of the CheckCIF report is at 2.3 Å from the Sm site.

The CIF files along with structure factor tables have been deposited with the Cambridge Crystallographic Data Centre (the deposition numbers are listed in Table S1) and a copy of these data

are available free of charge upon request from the CCDC web-site:  
[http://www.ccdc.cam.ac.uk/data\\_request/cif](http://www.ccdc.cam.ac.uk/data_request/cif) or by e-mail: [deposit@ccdc.cam.ac.uk](mailto:deposit@ccdc.cam.ac.uk).

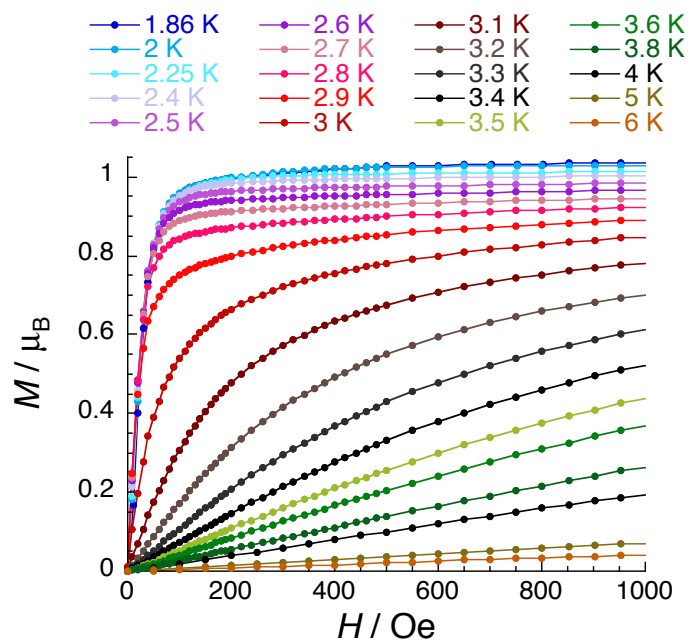

**Figure S1.** Low field ( $< 1000$  Oe)  $M$  vs.  $H$  data for **1** after cooling the sample in zero-dc field from 10 K to the indicated temperature with field scanning rates between 20 and 100 Oe  $\text{min}^{-1}$ .

**Table S1.** Crystallographic Details for [Ln(hfac)<sub>3</sub>(boaDTDA)]<sub>n</sub> (Ln = Sm & La).

| Complex                                                      | <b>1</b>                                                                                      |                                                                   |                                                                   |                                                                   |                                                                   |                                                                   | <b>2<sup>[7]</sup></b>                                                                        |
|--------------------------------------------------------------|-----------------------------------------------------------------------------------------------|-------------------------------------------------------------------|-------------------------------------------------------------------|-------------------------------------------------------------------|-------------------------------------------------------------------|-------------------------------------------------------------------|-----------------------------------------------------------------------------------------------|
| Formula                                                      | SmC <sub>23</sub> H <sub>7</sub> F <sub>18</sub> N <sub>3</sub> O <sub>7</sub> S <sub>2</sub> |                                                                   |                                                                   |                                                                   |                                                                   |                                                                   | LaC <sub>23</sub> H <sub>7</sub> F <sub>18</sub> N <sub>3</sub> O <sub>7</sub> S <sub>2</sub> |
| Formula weight                                               | 993.79                                                                                        |                                                                   |                                                                   |                                                                   |                                                                   |                                                                   | 982.35                                                                                        |
| Wavelength (Å)                                               | 0.71073                                                                                       |                                                                   |                                                                   |                                                                   |                                                                   |                                                                   | 0.71073                                                                                       |
| Crystal System                                               | orthorhombic                                                                                  |                                                                   |                                                                   |                                                                   |                                                                   |                                                                   | orthorhombic                                                                                  |
| Space Group                                                  | <i>Pbca</i>                                                                                   |                                                                   |                                                                   |                                                                   |                                                                   |                                                                   | <i>Pbca</i>                                                                                   |
| <i>T</i> (K)                                                 | 100(2)                                                                                        | 150(2)                                                            | 200(2)                                                            | 250(2)                                                            | 300(2)                                                            |                                                                   | 150(2)                                                                                        |
| Unit cell dimensions (Å)                                     | <i>a</i>                                                                                      | 19.8011(2)                                                        | 19.85308(16)                                                      | 19.9769(2)                                                        | 20.0503(2)                                                        | 20.1162(2)                                                        | 20.0045(2)                                                                                    |
|                                                              | <i>b</i>                                                                                      | 14.62079(12)                                                      | 14.68673(10)                                                      | 14.81100(16)                                                      | 14.9396(2)                                                        | 15.14532(19)                                                      | 14.6473(2)                                                                                    |
|                                                              | <i>c</i>                                                                                      | 21.27781(15)                                                      | 21.32145(13)                                                      | 21.41308(19)                                                      | 21.4630(2)                                                        | 21.5437(2)                                                        | 21.3848(3)                                                                                    |
| Volume (Å <sup>3</sup> )                                     |                                                                                               | 6160.09(9)                                                        | 6216.84(8)                                                        | 6335.66(11)                                                       | 6429.10(12)                                                       | 6563.64(12)                                                       | 6266.03(13)                                                                                   |
| <i>Z</i>                                                     |                                                                                               | 8                                                                 | 8                                                                 | 8                                                                 | 8                                                                 | 8                                                                 | 8                                                                                             |
| Density calc. (g/cm <sup>3</sup> )                           |                                                                                               | 2.143                                                             | 2.124                                                             | 2.084                                                             | 2.053                                                             | 2.011                                                             | 2.083                                                                                         |
| Absorption coefficient (mm <sup>-1</sup> )                   |                                                                                               | 2.201                                                             | 2.181                                                             | 2.140                                                             | 2.109                                                             | 2.065                                                             | 1.653                                                                                         |
| <i>F</i> (000)                                               |                                                                                               | 3824                                                              | 3824                                                              | 3824                                                              | 3824                                                              | 3824                                                              | 3784                                                                                          |
| $\theta$ range for data collection (°)                       |                                                                                               | 2.58 to 36.32                                                     | 1.97 to 37.78                                                     | 2.64 to 33.73                                                     | 2.62 to 32.58                                                     | 2.61 to 28.70                                                     | 3.34 to 30.51                                                                                 |
| Index ranges                                                 |                                                                                               | -32 ≤ <i>h</i> ≤ 33<br>-24 ≤ <i>k</i> ≤ 24<br>-35 ≤ <i>l</i> ≤ 35 | -34 ≤ <i>h</i> ≤ 34<br>-25 ≤ <i>k</i> ≤ 24<br>-36 ≤ <i>l</i> ≤ 36 | -31 ≤ <i>h</i> ≤ 31<br>-23 ≤ <i>k</i> ≤ 23<br>-33 ≤ <i>l</i> ≤ 33 | -30 ≤ <i>h</i> ≤ 30<br>-22 ≤ <i>k</i> ≤ 22<br>-32 ≤ <i>l</i> ≤ 32 | -27 ≤ <i>h</i> ≤ 27<br>-20 ≤ <i>k</i> ≤ 20<br>-29 ≤ <i>l</i> ≤ 29 | -28 ≤ <i>h</i> ≤ 28<br>-20 ≤ <i>k</i> ≤ 20<br>-30 ≤ <i>l</i> ≤ 30                             |
| Refl. coll.                                                  |                                                                                               | 200643                                                            | 145067                                                            | 175977                                                            | 172554                                                            | 135461                                                            | 145052                                                                                        |
| Ind. refl.                                                   |                                                                                               | 14915 [ <i>R</i> (int) = 0.0621]                                  | 16678 [ <i>R</i> (int) = 0.0405]                                  | 12652 [ <i>R</i> (int) = 0.0713]                                  | 11709 [ <i>R</i> (int) = 0.0627]                                  | 8465 [ <i>R</i> (int) = 0.0603]                                   | 9558 [ <i>R</i> (int) = 0.0307]                                                               |
| Completeness to $\theta$ max (%)                             |                                                                                               | 100                                                               | 100                                                               | 99.9                                                              | 99.9                                                              | 99.9                                                              | 99.9                                                                                          |
| Absorption correction                                        |                                                                                               | Semi-empirical from equivalents                                                               |
| Max. and min. transmission                                   |                                                                                               | 0.667 and 0.308                                                   | 0.670 and 0.311                                                   | 0.674 and 0.316                                                   | 0.678 and 0.320                                                   | 0.683 and 0.326                                                   | 0.790 and 0.595                                                                               |
| Refinement method                                            |                                                                                               | Full-matrix least-squares on <i>F</i> <sup>2</sup>                                            |
| Data / restraints / parameters                               |                                                                                               | 14915 / 69 / 516                                                  | 16678 / 87 / 543                                                  | 12652 / 87 / 543                                                  | 11709 / 87 / 543                                                  | 8465 / 87 / 543                                                   | 9558 / 234 / 514                                                                              |
| Goof on <i>F</i> <sup>2</sup>                                |                                                                                               | 1.179                                                             | 1.088                                                             | 1.108                                                             | 1.100                                                             | 1.092                                                             | 1.043                                                                                         |
| Final <i>R</i> indices [ <i>I</i> > 2 $\sigma$ ( <i>I</i> )] |                                                                                               | <i>R</i> 1 = 0.0426<br><i>wR</i> 2 = 0.0873                       | <i>R</i> 1 = 0.0268<br><i>wR</i> 2 = 0.0556                       | <i>R</i> 1 = 0.0369<br><i>wR</i> 2 = 0.0973                       | <i>R</i> 1 = 0.0412<br><i>wR</i> 2 = 0.0993                       | <i>R</i> 1 = 0.0417<br><i>wR</i> 2 = 0.1061                       | <i>R</i> 1 = 0.0205<br><i>wR</i> 2 = 0.0510                                                   |
| <i>R</i> indices (all data)                                  |                                                                                               | <i>R</i> 1 = 0.0722<br><i>wR</i> 2 = 0.1025                       | <i>R</i> 1 = 0.0471<br><i>wR</i> 2 = 0.0625                       | <i>R</i> 1 = 0.0596<br><i>wR</i> 2 = 0.1106                       | <i>R</i> 1 = 0.0739<br><i>wR</i> 2 = 0.1173                       | <i>R</i> 1 = 0.0697<br><i>wR</i> 2 = 0.1240                       | <i>R</i> 1 = 0.0241<br><i>wR</i> 2 = 0.0536                                                   |
| Largest diff. peak & hole (e.Å <sup>3</sup> )                |                                                                                               | 5.4 & -1.9                                                        | 2.3 & -1.0                                                        | 2.5 & -1.4                                                        | 3.0 & -1.0                                                        | 1.6 & -0.8                                                        | 0.7 & -0.5                                                                                    |
| CCDC deposition number                                       |                                                                                               | #1413999                                                          | #1414003                                                          | #1414000                                                          | #1414001                                                          | #1414002                                                          | #936895                                                                                       |

**Table S2.** Selected Contacts in the Structures for  $[\text{Ln}(\text{hfac})_3(\text{boaDTDA})]_n$  ( $\text{Ln} = \text{Sm} \text{ \& } \text{La}$ ).

| Complex                                                                                                          | <b>1</b>                                       |       |       |       |       | <b>2<sup>[7]</sup></b>                         |
|------------------------------------------------------------------------------------------------------------------|------------------------------------------------|-------|-------|-------|-------|------------------------------------------------|
| Formula                                                                                                          | $[\text{Sm}(\text{hfac})_3(\text{boaDTDA})]_n$ |       |       |       |       | $[\text{La}(\text{hfac})_3(\text{boaDTDA})]_n$ |
| T (K)                                                                                                            | 100                                            | 150   | 200   | 250   | 300   | 150                                            |
| <b>Bond distances (<math>\text{\AA}</math>)<sup>a</sup></b>                                                      |                                                |       |       |       |       |                                                |
| Ln – N1                                                                                                          | 2.742                                          | 2.744 | 2.748 | 2.739 | 2.730 | 2.831                                          |
| Ln – N4                                                                                                          | 2.961                                          | 3.006 | 3.071 | 3.176 | 3.335 | 2.935                                          |
| Ln – N14                                                                                                         | 2.630                                          | 2.629 | 2.632 | 2.621 | 2.612 | 2.749                                          |
| Ln – O7                                                                                                          | 3.371                                          | 3.395 | 3.438 | 3.496 | 3.583 | 3.207                                          |
| <b>Nearest neighbor intermolecular contact distances (<math>\text{\AA}</math>)<sup>b</sup></b>                   |                                                |       |       |       |       |                                                |
| S2...C10 <sup>c</sup>                                                                                            | 3.747                                          | 3.752 | 3.782 | 3.822 | 3.889 | 3.804                                          |
| S2...C11                                                                                                         | 3.649                                          | 3.669 | 3.699 | 3.723 | 3.759 | 3.719                                          |
| F21...C10                                                                                                        | 3.558                                          | 3.571 | 3.594 | 3.600 | 3.599 | 3.689                                          |
| F21...C11                                                                                                        | 3.327                                          | 3.351 | 3.386 | 3.419 | 3.462 | 3.356                                          |
| F21...C12                                                                                                        | 3.633                                          | 3.691 | 3.767 | 3.824 | 3.897 | 3.638                                          |
| <b>Angle between DTDA least-squares planes of nearest ligands in the chain (<math>^\circ</math>)<sup>d</sup></b> |                                                |       |       |       |       |                                                |
|                                                                                                                  | 32.08                                          | 31.80 | 31.48 | 31.39 | 31.40 | 32.07                                          |

<sup>a</sup> Standard deviations within 0.001 – 0.004  $\text{\AA}$ .<sup>b</sup> Standard deviations within 0.001 – 0.008  $\text{\AA}$ .<sup>c</sup> In the free ligand, the calculated beta spin density at the C10 atom is significant. There is large alpha spin density at S2, thus short S2...C10 contacts may indicate an efficient McConnell I mechanism for FM coupling between chains.<sup>d</sup> Standard deviations within 0.02 – 0.07  $^\circ$ .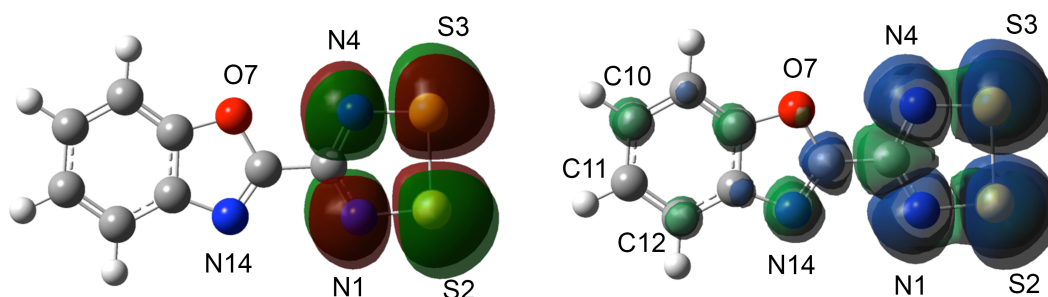**Figure S2.** (a) Singly occupied molecular orbital (SOMO) of the boaDTDA ligand and (b) spin density distribution of the boaDTDA ligand (blue = alpha; green = beta) using uB3LYP/6-31G(d,p).<sup>[8]</sup>

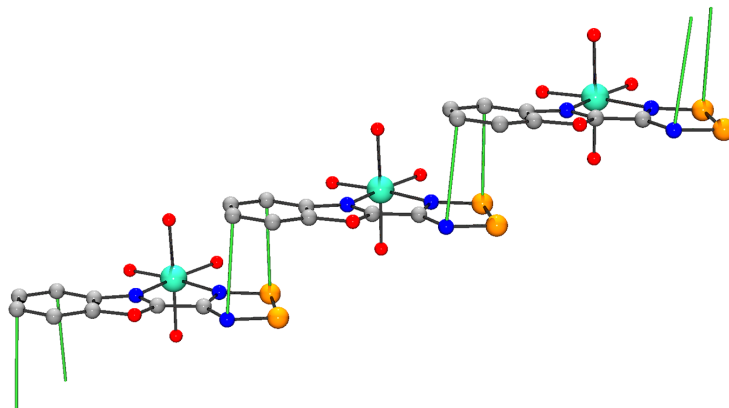

**Figure S3.** Excerpt from the crystal structure of the related Ni(hfac)<sub>2</sub>(boaDTDA) complex<sup>[9]</sup> illustrating intermolecular contacts responsible for McConnell I ferromagnetic interactions.

Beyond the sulphur-carbon contacts described in the manuscript, contacts between chains in **1** involving the F atoms of hfac ligands and atoms of neighbouring boaDTDA ligands are also present. Sm(III) is weakly paramagnetic ( $0.09 \text{ cm}^3 \text{ K mol}^{-1}$ ), thus the spin density is extremely small at the metal ion, and should be even smaller at the F atoms. Although unlikely to contribute significantly to the magnetic properties of **1**, the short contacts involving F atoms are also documented in Table S2 and shown in Figure S4.

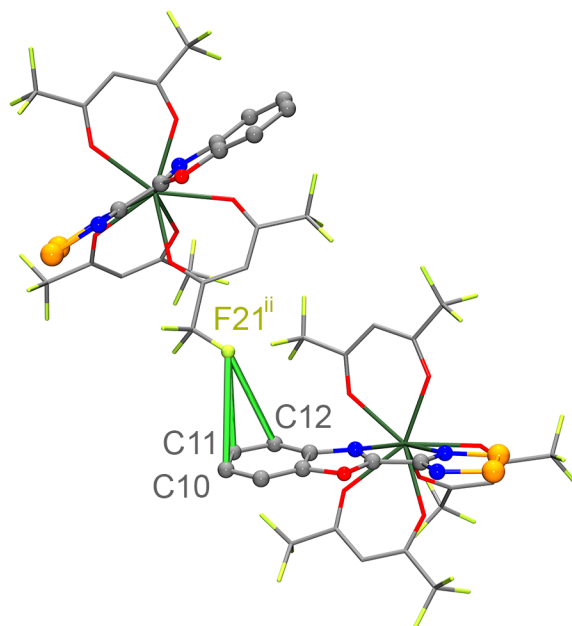

**Figure S4.** Excerpt from the crystal structure of **1** viewed down [010] illustrating an example of the close contacts between F atoms and boaDTDA C atoms of neighbouring chains; symmetry codes: (ii)  $x - 1/2, y, 3/2 - z$ .

## References for the Supporting Information

- [1] Fatila, E. M.; Hetherington, E. E.; Jennings, M.; Lough, A. J.; Preuss, K. E. *Dalton Trans.* **2012**, *41*, 1352-1362.
- [2] Fatila, E. M.; Goodreid, J. G.; Clérac, R.; Jennings, M.; Assoud, J.; Preuss, K. E. *Chem. Commun.* **2010**, *46*, 6569-6571.
- [3] Agilent Technologies (**2011**) Agilent Technologies, Xcalibur CCD system, CrysAlisPro Software system; Version 1.171.35.8.
- [4] Sheldrick, G. M. *Acta Crystallogr.* **2008**, *A64*, 112-122.
- [5] Farrugia, L. J. *J. Appl. Crystallogr.* **1999**, *32*, 837-838.
- [6] Dolomanov, O. V.; Bourhis, L. J.; Gildea, R. J.; Howard, J. A. K.; Puschmann, H. *J. Appl. Crystallogr.* **2009**, *42*, 339-341.
- [7] Fatila, E. M.; Clérac, R.; Rouzières, M.; Soldatov, D. V.; Jennings, M.; Preuss, K. E. *Chem. Commun.* **2013**, *49*, 6271-6273.
- [8] Frisch, M. J.; Trucks, G. W.; Schlegel, H. B.; Scuseria, G. E.; Robb, M. A.; Cheeseman, J. R.; Scalmani, G.; Barone, V.; Mennucci, B.; Petersson, G. A.; Nakatsuji, H.; Caricato, M.; Li, X.; Hratchian, H. P.; Izmaylov, A. F.; Bloino, J.; Zheng, G.; Sonnenberg, J. L.; Hada, M.; Ehara, M.; Toyota, K.; Fukuda, R.; Hasegawa, J.; Ishida, M.; Nakajima, T.; Honda, Y.; Kitao, O.; Nakai, H.; Vreven, T.; Montgomery, J. J. A.; Peralta, J. E.; Ogliaro, F.; Bearpark, M.; Heyd, J. J.; Brothers, E.; Kudin, K. N.; Staroverov, V. N.; Kobayashi, R.; Normand, J.; Raghavachari, K.; Rendell, A.; Burant, J. C.; Iyengar, S. S.; Tomasi, J.; Cossi, M.; Rega, N.; Millam, J. M.; Klene, M.; Knox, J. E.; Cross, J. B.; Bakken, V.; Adamo, C.; Jaramillo, J.; Gomperts, R.; Stratmann, R. E.; Yazyev, O.; Austin, A. J.; Cammi, R.; Pomelli, C.; Ochterski, J. W.; Martin, R. L.; Morokuma, K.; Zakrzewski, V. G.; Voth, G. A.; Salvador, P.; Dannenberg, J. J.; Dapprich, S.; Daniels, A. D.; Farkas, O.; Foresman, J. B.; Ortiz, J. V.; Cioslowski, J.; Fox, D. J. *Gaussian 09, Revision A.02*, (2009) Gaussian Inc., Wallingford, CT.
- [9] Fatila, E. M.; Clérac, R.; Jennings, M.; Preuss, K. E. *Chem. Commun.* **2013**, *49*, 9431-9433.
